# Supplementary material
Source: Springer Nature journal article supplement (https://www.springermedizin.de/resource/supplementary/12992_2012_155_MOESM2_ESM.pdf/9616578)
Supplement: MOESM2 [file 9616578]

**MeSH keywords (exploded and combined):**

Healthcare quality, access and evaluation  
International cooperation  
Hospitals  
Learning  
(Africa OR Asia) AND (Europe OR North America)

Total number yielded: 227 articles

20 non-English language articles

207 articles underwent title and abstract review

127 studies focusing on various issues  
unrelated to search

80 articles underwent title and abstract review

27 articles not found in databases

53 articles analysed

35 articles found to be unrelated to the  
study question

18 articles found relevant to the research  
question & pertinent in content

47 articles found by hand searching  
grey literature and cited references

65 articles - data extracted & synthesized
